# Supplementary material for: Home Cooking Is Related to Potential Reduction in Cardiovascular Disease Risk among Adolescents: Results from the A-CHILD Study
Source: MDPI journal article supplement (doi:10.3390/nu12123845), 2020-12-16
Supplement: s1 [file s1]

**Table 1.** Mediation analyses between low frequency of home cooking and adolescents' indicators of cardiometabolic factors among Japanese junior high school children.

| <b>Mediator</b>                                 | <b>DBP</b>                    |                                                     | <b>HDL</b>                    |                                                     |
|-------------------------------------------------|-------------------------------|-----------------------------------------------------|-------------------------------|-----------------------------------------------------|
|                                                 | <b>Proportion Mediated, %</b> | <b><i>p</i> Value for Estimated Indirect Effect</b> | <b>Proportion Mediated, %</b> | <b><i>p</i> Value for Estimated Indirect Effect</b> |
| Adolescent's BMI                                | 2.2                           | 0.58                                                | 6.3                           | 0.56                                                |
| Adolescent's frequency of vegetable intake      | -3.4                          | 0.55                                                | 9.7                           | 0.09                                                |
| Adolescent's frequency of breakfast consumption | 12.3                          | 0.19                                                | 14.9                          | 0.10                                                |

BMI: body mass index. Frequency of home cooking was treated as a binary, with 0 = middle-high frequency of home cooking and 1 = low frequency of home cooking. Models: Adjusted for child's sex, household income and mother's diabetes.
